# Supplementary material for: Time-resolved spectroscopy of a photoactive dinuclear W/Ru complex: spectroscopic evidence for a metastable intermediate with side-on coordinated carbonyl ligand
Source: Royal Society of Chemistry journal article supplement (doi:10.1039/d6sc00998k), 2026-04-17
Supplement: d6sc00998k1.pdf [file d6sc00998k1.pdf]

## Supplementary Information

### Time-resolved spectroscopy of a photoactive dinuclear W/Ru complex: Spectroscopic evidence for a metastable intermediate with *side-on* coordinated carbonyl ligand

Jan-Hendrik Borter,<sup>a</sup> Sayan Kangsa Banik,<sup>a</sup> Kristian Kunze,<sup>b,c</sup> Stephan Kupfer,<sup>\*d</sup> Dirk Schwarzer,<sup>\*a</sup> and Wolfram W. Seidel<sup>\*b,c</sup>

<sup>a</sup> Max Planck Institute for Multidisciplinary Sciences, Am Fassberg 11, 37077 Göttingen, Germany. E-mail: [dschwar@mpinat.mpg.de](mailto:dschwar@mpinat.mpg.de)

<sup>b</sup> Institut für Chemie, Universität Rostock, Albert-Einstein-Straße 3a, 18059 Rostock, Germany. E-mail: [wolfram.seidel@uni-rostock.de](mailto:wolfram.seidel@uni-rostock.de)

<sup>c</sup> Leibniz-Institut für Katalyse e.V., Albert-Einstein-Straße 29a, 18059 Rostock, Germany.

<sup>d</sup> Institute of Physical Chemistry, Friedrich Schiller University Jena, Helmholtzweg 4, 07743 Jena, Germany. E-mail: [stephan.kupfer@uni-jena.de](mailto:stephan.kupfer@uni-jena.de)

## 1. Experimental section

### 1.1. Transient absorption spectroscopy

The laser spectrometer to record transient UV-vis and mid-IR spectra is described in detail by Julia Franz et al.<sup>1</sup> UV-vis and mid-IR experiments were performed with sample concentrations of <1 mM in a quartz glass cell (2 mm path length) and a stainless-steel cell equipped with CaF<sub>2</sub> windows (0.5 mm path length), respectively. Magnetic stirrers were employed to avoid accumulation of photoproducts in the laser focus. Samples were excited with pump energies of 2 μJ focused to a diameter of 0.2 mm.

### 1.2. Kinetic model for the IR transient absorption spectra of complex 1

The kinetic model shown in Figure 3 (left panel) of the main paper results in a set of coupled differential equations for the time-dependent concentrations in the CO stretching  $\nu$ -states of the ground and the triplet state,  $G_n$  and  $T_1$ , respectively (short-lived excited singlet and triplet states are omitted; only the vibrational ground state of the  $T_1$  is considered)

$$\begin{aligned}\frac{dT_1}{dt} &= -\frac{T_1}{\tau_{T_1}} \\ \frac{dG_0}{dt} &= k_0 T_1 + k_{10} G_1 \\ \frac{dG_n}{dt} &= k_n T_1 + (n+1)k_{10} G_{n+1} - n k_{10} G_n ; \text{ for } n = 1, 2, \dots\end{aligned}\tag{S1}$$

In Eqs. S1 the lifetime of  $T_1$  is given by  $\tau_{T_1} = 1/\sum k_n$  where  $k_n$  represents the rate constant for repopulating the ground vibrational state  $n$ . Within perturbation theory bilinear coupling of the CO

oscillator to a thermal bath results in one quantum allowed transitions ( $\Delta v = \pm 1$ ) where the downward rate constants  $n \rightarrow n-1$  are proportional to the vibrational quantum number<sup>6,7</sup>, i.e.

$$k_{n,n-1} = n \cdot k_{10}; (n = 1, 2, \dots) \quad (\text{S2})$$

Moreover, upward and downward rate constants are coupled by detailed balance

$$\frac{k_{n-1,n}}{k_{n,n-1}} = \exp\left(-\frac{(E_n - E_{n-1})}{k T}\right) \quad (\text{S3})$$

where  $E_n - E_{n-1}$  corresponds to the energy difference between the vibrational states, and  $k$  and  $T$  are Boltzmann constant and temperature, respectively. In general, the detailed balance condition ensures that the population approaches the correct equilibrium distribution for  $t \rightarrow \infty$ . In the case of the CO stretching vibration the upward process  $n-1 \rightarrow n$  can be neglected because at room temperature the

Boltzmann factor in Eq. (S3) is only  $\exp\left(-\frac{hc \nu_{01}}{k T}\right) = 10^{-4}$ . Eq. (S2) allows to describe the vibrational relaxation cascade and the associated emerging time-dependent population distribution  $G_n(t)$  in the ground state by a single parameter,  $k_{10}$ .

The rate constants  $k_n$  were adjusted to result in a  $T_1$  lifetime of  $\tau_{T1} = 0.25 \text{ ps}$  (consistent with the fast decay component seen in the UV-vis transients of **1**) and, at the same time, to create a truncated Boltzmann distribution within the CO stretching vibrational manifold of the ground state, i.e.

$$k_n \propto \left[ \exp\left(-n \cdot \frac{hc \nu_{01}}{k T_{vib}}\right) - \exp\left(- (n_{max} + 1) \cdot \frac{hc \nu_{01}}{k T_{vib}}\right) \right] \quad (\text{S4})$$

where  $T_{vib}$  corresponds to an adjustable vibrational temperature and  $n_{max}$  is the highest  $v$ -state taken into account for ground state repopulation. Since the IR transients in Figure 2 fade out below  $1750 \text{ cm}^{-1}$  a value of  $n_{max} = 5$  was chosen and  $k_n = 0$  for  $n > n_{max}$ .

For calculating spectra we applied the harmonic approximation giving a linear dependence of the cross section for absorption and stimulated emission on the vibrational quantum number<sup>8</sup>. Hence, the ground state absorption spectrum is represented by

$$A_G(\nu, t) = \sum_{n=0}^{n_{max}} (G_n(t) - G_{n+1}(t)) (n+1) \sigma_{01} \cdot L_G(\nu - \nu_{01} + n \cdot 2\omega_e x_e) \quad (\text{S5})$$

Where  $G_n(t) - G_{n+1}(t)$  is the population difference between adjacent vibrational states  $n$  and  $n+1$ ,  $\sigma_{01}$  is the absorption cross section for the  $v=0 \rightarrow 1$  transition,  $L_G(\nu)$  is a line shape function, and  $2\omega_e x_e$  is the anharmonicity of the CO stretching vibration. Difference spectra were calculated by adding the time-dependent absorption of the triplet state

$$A_{T1}(\nu, t) = T_1(t) \sigma_{T1} \cdot L_{T1}(\nu - \nu_{T1}) \quad (\text{S6})$$

(with corresponding population  $T_1(t)$  in the  $v=0$  state, cross section  $\sigma_{T1}$ , and line shape function  $L_{T1}(\nu)$  of the  $v=0 \rightarrow 1$  transition) and subtracting the ground state room temperature spectrum  $A_G(\nu, 300K)$  when the relaxation is completed (eq.(S5) with  $G_0 = 1$  and all other populations zero), i.e.

$$\Delta A(\nu, t) = A_G(\nu, t) + A_{T1}(\nu, t) - A_G(\nu, 300K) \quad (\text{S7})$$

In Eq. (S5) the line shape function for all ground state transitions was assumed to be identical to the FTIR spectral line shape of the fundamental mode (upper panel in Fig. 2a of the main text). For the  $T_1$  state a Gaussian line shape of the form

$$g(\nu) = \frac{2\sigma}{\Delta\nu} \sqrt{\frac{\ln(2)}{\pi}} \exp\left[-4\ln(2)\left(\frac{\nu - \nu_0}{\Delta\nu}\right)^2\right] \quad (\text{S8})$$

was employed, where  $\sigma$  is the integrated cross section,  $\Delta\nu$  the full width at half maximum (FWHM) and  $\nu_0$  the line center of the transition.

Using the initial relative populations  $(T_1)_{t=0} = 1$  and  $(G_n)_{t=0} = 0$  and adjustable values for  $k_{10}$ ,  $T_{vib}$ , and the line shape parameters, the experimental transient difference spectra were fitted. The result shown in Figure 3 (right panel) of the main text was obtained with  $k_{10} = 0.077 \text{ ps}^{-1}$  and  $T_{vib} = 4500 \pm 500 \text{ K}$ . The complete set of fit parameters is summarized in Table S1.

**Table S1.** Line shape and kinetic parameters for fitting the transient IR absorption spectra of complex **1**.

| Species | $\sigma^a$ | $\nu_0/\text{cm}^{-1b}$            | $\Delta\nu/\text{cm}^{-1c}$ | Rate constant/ $\text{ps}^{-1}$                                                                                           |
|---------|------------|------------------------------------|-----------------------------|---------------------------------------------------------------------------------------------------------------------------|
| $T_1$   | 1          | 1925                               | 30                          | $k_0 = 2.088$ , $k_1 = 1.035$ ,<br>$k_2 = 0.504$ , $k_3 = 0.237$ ,<br>$k_4 = 0.102$ , $k_5 = 0.034$ ,<br>$k_{10} = 0.077$ |
| $G_n$   | $(n + 1)$  | $\nu_{01} - n \cdot 2\omega_e x_e$ | — <sup>d</sup>              |                                                                                                                           |

<sup>a</sup> integrated cross section relative to  $\sigma^{01}$  of the ground state CO stretching absorption band;

<sup>b</sup> line center; <sup>c</sup> Gaussian line width (FWHM); <sup>d</sup> line shape of the stationary FTIR spectrum.

### 1.3. Decomposing the early-time IR transients of the W-Ru complex 2-PF<sub>6</sub> into excited-state absorption and ground-state bleach

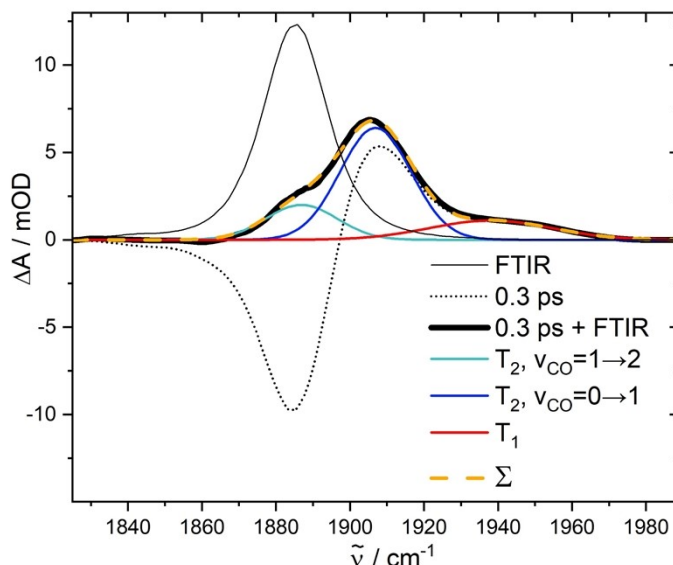

**Figure S1.** The pure excited state absorption (thick black line) in the 0.3 ps pump-probe delay transient IR spectrum is obtained by removing the ground state bleach component. This is done by adding the scaled FTIR spectrum (thin black line) to the 0.3 ps transient (dotted line), with the scaling factor chosen so that the negative absorption at the red edge of the spectrum just disappears. The resulting excited state absorption is fitted by a sum of three Gaussians (dashed yellow line) centred at 1884, 1904, and 1945  $\text{cm}^{-1}$ . The first two are attributed to the  $\nu = 1 \rightarrow 2$  (light blue) and  $\nu = 0 \rightarrow 1$  (dark blue) transitions of the CO stretching vibration in the  $T_2$  state, the latter (red) corresponds to the fundamental CO transition in the  $T_1$  state of the W-Ru complex 2-PF<sub>6</sub>.

### 1.4. Kinetic model for the IR transient absorption spectra of 2-PF<sub>6</sub>

The kinetic model shown in Figure 6 of the main paper results in the following set of coupled differential equations for the time-dependent concentrations of the  $T_2$  state in  $\nu_{\text{CO}} = 1$  and 2,  $T_{2,1}$  and  $T_{2,0}$ , respectively, as well as  $T_1$ ,  $I$ , and the excited CO stretching  $\nu$ -states of the ground state (neglecting all short-lived precursor states as e.g.  $S_n$ ):

$$\begin{aligned} \frac{dT_{2,1}}{dt} &= -(k_{ET} + k_{10})T_{2,1} \\ \frac{dT_{2,0}}{dt} &= -k_{ET}T_{2,0} + k_{10}T_{2,1} \\ \frac{dT_1}{dt} &= k_{ET}(T_{2,1} + T_{2,0}) - k_I T_1 - \left( \sum_{n=0}^3 k_n \right) T_1 \\ \frac{dI}{dt} &= k_I T_1 - k_G I \\ \frac{dG_0}{dt} &= k_0 T_1 + k_G I + k_{10} G_1 \end{aligned} \tag{S9}$$

$$\frac{dG_n}{dt} = k_n T_1 + (n+1)k_{10}G_{n+1} - n k_{10}G_n; \text{ for } n = 1, 2, 3$$

The resultant time-dependent concentrations are used to calculate the IR difference absorption spectrum

$$\Delta A(\nu, t) = A_G(\nu, t) + A_{T_2}(\nu, t) + A_{T_1}(\nu, t) + A_I(\nu, t) - A_G(\nu, 300K) \quad (\text{S10})$$

where

$$A_G(\nu, t) = \sum_{n=0}^3 (G_n(t) - G_{n+1}(t))(n+1)\sigma_{01} \cdot L_G(\nu - \nu_{01} + n \cdot 2\omega_e x_e) \quad (\text{S11})$$

$$A_{T_2}(\nu, t) = (T_{2,1}(t) - T_{2,0}(t))\sigma_{T_2} \cdot L_{T_2}(\nu - \nu_{T21}) + T_{2,1}(t) \cdot 2\sigma_{T_2} \cdot L_{T_2}(\nu - \nu_{T20}) \quad (\text{S12})$$

$$A_{T_1}(\nu, t) = T_1(t) \sigma_{T_1} \cdot L_{T_1}(\nu - \nu_{T1}) \quad (\text{S13})$$

$$A_I(\nu, t) = I(t) \sigma_I \cdot L_I(\nu - \nu_I) \quad (\text{S14})$$

and  $A_G(\nu, 300K)$  corresponds to the ground state room temperature spectrum when the relaxation

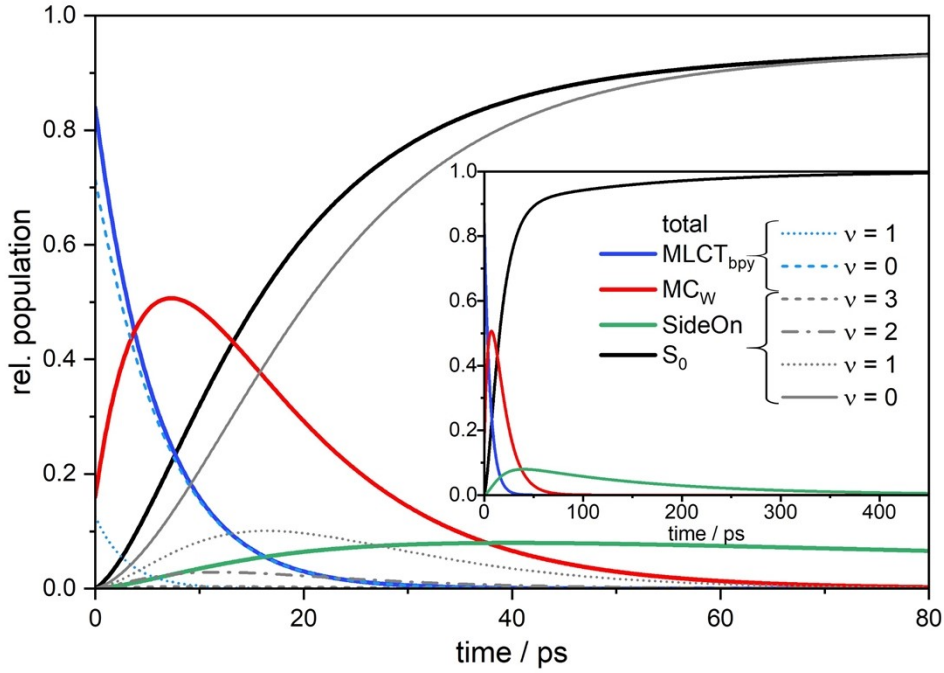

**Figure S2.** Time-dependent populations for the photo-excited complex **2-PF<sub>6</sub>** resulting from the kinetic model of Figure 7 and rate constants of Table 1 of the main paper.

is completed and all the population ends in  $G_0$ . For the line shape function  $L_G$  of all ground state transitions we used the FTIR spectral line shape of the stationary absorption spectrum (Figure 5 of the main text). For  $L_{T_2}$ ,  $L_{T_1}$ , and  $L_I$  Gaussian line shapes (Eq. (S8)) were employed. The simulated IR transients of Figure 7 were obtained with a set of parameters presented in Table 1. Corresponding time-dependent concentrations are shown in Figure S3.

### 1.5. Calculation of UV-vis transient absorption spectra for 2-PF<sub>6</sub>

The simulation of time-dependent UV-vis transients is based on the ground state and excited state spectra  $S_i(\lambda)$  derived from TDDFT calculations (see Figure S5) and the kinetic model from the previous section, which provides time-dependent populations for all relevant states. In contrast to the IR spectra, for the calculation of the UV-vis transients we neglect the influence of vibrational excitation in the CO stretching or any other mode on the electronic spectrum. We also neglect the possibility of vibronic excitation in the absorption spectra. Then the UV-vis transient difference spectrum is given by

$$\Delta A(\lambda, t) = T_2(t) \cdot S_{T2}(\lambda) + T_1(t) \cdot S_{T1}(\lambda) + I(t) \cdot S_I(\lambda) + (1 - G(t)) \cdot S_G(\lambda) \quad (\text{S15})$$

Where  $T_2(t) = \sum_{n=0}^2 T_{2,n}(t)$ ,  $T_1(t)$ ,  $I(t)$ , and  $G(t) = \sum_{n=0}^3 G_n(t)$  are the time-dependent populations in each electronic state. The calculated UV-vis transients are shown in Figure S6.

## 2. Quantum chemistry

### 2.1. Computational details

All quantum chemical calculations assessing the structural and electronic properties of complexes **1** and **[2]<sup>+</sup>** were carried out using the Gaussian 16 program.<sup>2</sup> Density functional theory (DFT) was employed to obtain the fully relaxed singlet ground state ( $S_0$ ) and the lowest triplet state ( $T_1$ ) of the two complexes. Furthermore, two possible *side-on* species of **[2]<sup>+</sup>** were investigated within singlet and triplet multiplicity, i.e., with the CO ligand being coordinated via one of its  $\pi_{CO}/\pi_{CO}^*$  orbitals. The triplet species of the *side-on* complex was found to be dissociative and was not investigated further. Finally, the possible W-CO bond breakage in **[2]<sup>+</sup>** was investigated (singlet and triplet) applying the B3LYP XC functional<sup>3</sup> in combination with the all-electron def2-SVP basis set.<sup>4</sup> Additionally, dispersion correction was included using the GD3 model with Becke-Johnson damping.<sup>5</sup> Implicit solvent effects (acetonitrile,  $\epsilon = 35.688$ ) were taken into account by the polarizable continuum model (PCM) using the equilibrium procedure of the SMD solvation model.<sup>6</sup> The vibrational frequency calculations showed that all obtained geometries are minima of the potential energy surface. In order to account for the approximation treatment of electron correlation and anharmonicity, all simulated vibrational frequencies were scaled by a factor of 0.95.<sup>7</sup> All fully optimised equilibrium structures are freely available via the Zenodo online repository.<sup>8</sup>

Subsequently, time-dependent DFT (TDDFT) was applied to assess the singlet and triplet excited states properties (i.e. electronic characters, energies and oscillator strengths) of **1** and **[2]<sup>+</sup>**, exclusively. Therefore, the same computational setup was employed as in the initial ground state calculations. Several studies on structurally related photoactive Ru(II)-based transition metal complexes showed that such computational protocol – combining hybrid functionals with a medium amount of exact-exchange and double- $\zeta$  basis sets – enables an accurate prediction of ground and excited states properties with respect to experimental data, e.g. UV-vis absorption, resonance Raman spectra, (spectro-)electrochemical, transient absorption and electron transfer properties.<sup>9</sup> A balanced description of excited states featuring, i. e., metal-to-ligand charge transfer (MLCT), ligand-to-metal charge transfer (LMCT), ligand-to-ligand charge transfer (LLCT), intra-ligand charge transfer (ILCT) and metal-to-metal charge transfer (MMCT) in case of binuclear coordination compounds such as the present W/Ru complex as well as intra-ligand (IL) and metal-centred (MC) character, as provided by the present computational setup, is essential to evaluate the rich photophysics of transition metal complexes. The excited state properties within the Franck-Condon point ( $S_0$  equilibrium structure of **[2]<sup>+</sup>**) were evaluated by means of the non-equilibrium procedure of solvation to estimate the initial vertical absorption energies. The 100 lowest energy singlet-singlet excitations were obtained to model the electronic absorption spectra of **[2]<sup>+</sup>**. In addition, the 100 lowest energy (dipole-forbidden) singlet-triplet transitions were evaluated in order to address the availability of prominent triplet states involved in the subsequent intersystem crossing (ISC) and excited state relaxation pathways. Furthermore, scalar-relativistic (SR-)TDDFT calculations were performed utilizing Orca 5.0.37<sup>10</sup> with scalar relativistic Douglas Kroll Hess Hamiltonian of 2nd-order to assess prominent pathways for intersystem crossing within the  $S_0$  structure, while the analogue computational protocol was applied as in the Gaussian 16 simulations (e.g., B3LYP/def2-svp and corresponding autoaux auxiliary basis set, SMD: acetonitrile). The 20 lowest singlet-singlet and singlet-triplet excitations were obtained, while spin-orbit couplings (SOCs) between these states and the singlet ground state were obtained at the SR-TDDFT level of theory.

Subsequently, to quantify the rate of intersystem crossing (ISC), the simplified formula of rate constant with Fourier transformed Lorentzian dephasing<sup>11</sup> was utilized, which was recently applied in the context of ISC in a Cr(III) spin-flip emitter.<sup>12</sup> For the energy downhill  $S_i \rightarrow T_j$  rate constant, the formula is shown as below

$$k_{ISC\downarrow} = \frac{2\gamma}{\hbar(\Delta E_{ij}^2 + \gamma^2)} |SOC|^2 \quad (S16)$$

where the  $\gamma$  represents the half width at half maximum (HWHM) of the simulated UV-vis spectrum,  $\Delta E_{ij}$  is the vertical energy difference at FC region, SOC denotes the spin-orbit coupling term and  $\hbar$  is the reduced Planck constant. In a similar manner, when the  $S_i \rightarrow T_j$  non-radiative transition is an energy-uphill transition, the correction is added:

$$k_{ISC\uparrow} = \frac{2\gamma}{\hbar(\Delta E_{ij}^2 + \gamma^2)} |SOC|^2 \exp\left(-\frac{\Delta E_{ij}}{k_B T}\right) \quad (S17)$$

where  $k_B$  is the Boltzmann constant and  $T$  is the temperature ( $T = 293.15$  K).

The lowest three triplet excited states (singlet-triplet excitations; of  $T_1$ :  ${}^3MC_W$ ,  $T_2$ :  ${}^3MLCT_{bpy1}$ ,  $T_3$ :  ${}^3MLCT_{bpy2}$ ) were relaxed at the TDDFT level of theory. All three triplet states relax to the lowest energy triplet state in their respective equilibrium structure and were optimised subsequently using (unrestricted) DFT. In case of **1**, only the lowest three singlet-triplet states within the equilibrated  ${}^3MC_W$  ( $T_1$ ) were assessed by TDDFT.

In addition, the time-resolved IR (TRIR) (**1** and **[2]<sup>+</sup>**) and transient absorption (TA) UV-vis spectra (only **[2]<sup>+</sup>**) were modelled within the three optimised triplet (ground) states, i.e., of the  ${}^3MC_W$  and the two  ${}^3MLCT_{bpy}$  states as well as of the singlet *side-on* species (only shown for lowest energy *side-on* complex). In case of TRIR, the excited state absorption was modelled by means vibrational normal modes as obtained within the relaxed triplet states, respectively. Ground state bleach was estimated based on the vibrational normal modes of the singlet ground state (within the Franck-Condon point). In case of TA-UV-vis, an analogue procedure was applied, while the excited state absorption was modelled by the lowest 100 spin and dipole-allowed triplet-triplet transitions as obtained within the previously optimized  $T_1$  equilibria and ground state bleach via the singlet-singlet transitions as obtained within the relaxed singlet ground state. In all transient spectra a 1:1 population of  $S_0$  and  $T_1$ , was assumed. In case of the side-on complex, a similar procedure was performed however the ESA was modelled by the singlet species rather than by the respective (dissociative) triplet analogue.

Finally, to access the kinetics of photoinduced electron transfer (ET) processes in **[2]<sup>+</sup>**, semi-classical Marcus theory was applied. According to Marcus theory, ET processes occur along the parabolic diabatic potential energy curves (PECs) of the electron donor state (D; i.e.  ${}^3MLCT_{bpy1}$ ) and the acceptor state (A; i.e.  ${}^3MC_W$ ) along the reaction coordinate  $R_{ET}$ . Thereby, thermal fluctuations of the solvent may lead to structural distortions within the donor state that provide sufficient electronic coupling between D and A to allow a population transfer between these electronic states. Herein, the rate constant,  $k$ , for such an ET is given within the semi-classical Marcus-picture by:

$$k = \frac{2\pi}{\hbar} |V_{DA}|^2 (4\pi\lambda k_B T)^{-\frac{1}{2}} \exp\left(-\frac{(\Delta G + \lambda)^2}{4\lambda k_B T}\right) \quad (S18)$$

where  $V_{DA}$  denotes electronic coupling between the D and A states at the crossing point of the diabatic PECs,  $\lambda$  is the reorganization energy,  $\Delta G$  represents the driving force, *i.e.* the Gibbs free energy, for the ET reaction,  $k_B$  is Boltzmann constant,  $T$  is absolute temperature.

In case of  $[2]^+$ , D and A states of interest are of triplet multiplicity. The ET kinetics were described along a linear-interpolated internal coordinate (LIIC) connecting the optimized equilibrium structures of the  ${}^3\text{MLCT}_{\text{bpy1}}$  (D) and the  ${}^3\text{MC}_W$  (A) states. The diabatic PECs for D and A were constructed along the LIIC (denoted  $R_{ET}$ ) by means of TDDFT single-point calculations. The electronic coupling  $V_{DA}(R_{ET})$  was obtained by a unitary transformation of the adiabatic states,  $V_1^{ad}(R_{ET})$  and  $V_2^{ad}(R_{ET})$ , to the respective diabatic states,  $V_D(R_{ET})$  and  $V_A(R_{ET})$ :

$$\begin{pmatrix} V_A(R_{ET}) & V_{AD}(R_{ET}) \\ V_{DA}(R_{ET}) & V_D(R_{ET}) \end{pmatrix} = U^{-1} \begin{pmatrix} V_1^{ad}(R_{ET}) & 0 \\ 0 & V_2^{ad}(R_{ET}) \end{pmatrix} U, \quad (\text{S19})$$

in which  $U$  is a general Unitary matrix, *i.e.*,  $\begin{pmatrix} \cos \theta & \sin \theta \\ -\sin \theta & \cos \theta \end{pmatrix}$ . The electronic coupling is then defined as:

$$V_{DA} = \frac{1}{2} |V_2^{ad} - V_1^{ad}| \sin(2\theta). \quad (\text{S20})$$

At the crossing point of the diabatic PEC ( $V_A = V_D$ ) a mixing angle of  $\theta = \pi/4$  is obtained and S20 simplifies to:

$$V_{DA} = \frac{1}{2} |V_2^{ad} - V_1^{ad}|_{\min}, \quad (\text{S21})$$

which is known as the minimum splitting method. This computational protocol was recently introduced and successfully applied to assess the intramolecular electron transfer kinetics in the frame of solar energy conversion and storage.<sup>9b,9c,13</sup>

## 2.2. Computational results

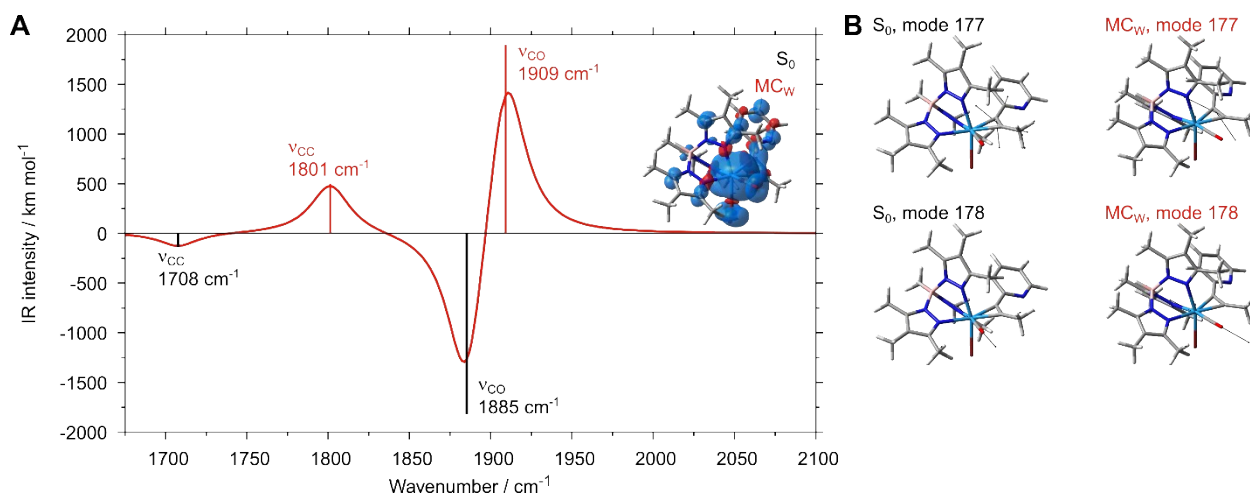

**Figure S3.** A: Simulated transient IR (TRIR) spectra of the tungsten complex **1** obtained at the B3LYP/def2-SVP level of theory with contributions of excited-state absorption given by vibrational normal modes within the fully relaxed  $T_1$  state of mixed  ${}^3MC_W/{}^3MLCT$  character (red; see spin density as inset). Key vibrations are indicated. B: Respective equilibrium structures and normal modes (displacement vector).

**Table S2.** Simulated vibrational frequencies of the tungsten complex **1** in  $cm^{-1}$  obtained at the B3LYP/def2-SVP level of theory.

|     |     |     |     |      |      |      |      |      |      |
|-----|-----|-----|-----|------|------|------|------|------|------|
| 19  | 124 | 280 | 569 | 869  | 1026 | 1334 | 1419 | 1701 | 3002 |
| 25  | 135 | 294 | 575 | 931  | 1032 | 1344 | 1422 | 1885 | 3008 |
| 32  | 140 | 296 | 611 | 933  | 1047 | 1350 | 1423 | 2534 | 3009 |
| 36  | 143 | 323 | 620 | 934  | 1069 | 1351 | 1423 | 2927 | 3012 |
| 39  | 146 | 328 | 628 | 938  | 1071 | 1351 | 1424 | 2930 | 3016 |
| 51  | 155 | 333 | 639 | 959  | 1075 | 1352 | 1429 | 2931 | 3023 |
| 58  | 167 | 337 | 656 | 962  | 1083 | 1353 | 1430 | 2931 | 3024 |
| 60  | 171 | 340 | 658 | 970  | 1124 | 1359 | 1431 | 2938 | 3028 |
| 66  | 178 | 368 | 661 | 973  | 1131 | 1362 | 1432 | 2940 | 3029 |
| 68  | 185 | 372 | 678 | 977  | 1156 | 1362 | 1433 | 2941 | 3036 |
| 71  | 191 | 384 | 680 | 984  | 1161 | 1364 | 1435 | 2941 | 3037 |
| 74  | 207 | 396 | 696 | 997  | 1168 | 1397 | 1438 | 2943 | 3069 |
| 83  | 212 | 453 | 714 | 998  | 1171 | 1401 | 1446 | 2945 | 3071 |
| 85  | 215 | 478 | 724 | 998  | 1177 | 1405 | 1453 | 2971 | 3090 |
| 89  | 224 | 499 | 725 | 999  | 1225 | 1406 | 1478 | 2976 | 3105 |
| 93  | 225 | 518 | 726 | 1011 | 1230 | 1408 | 1486 | 2978 |      |
| 101 | 229 | 520 | 730 | 1013 | 1238 | 1410 | 1489 | 2985 |      |
| 106 | 231 | 522 | 765 | 1013 | 1240 | 1411 | 1534 | 2989 |      |
| 110 | 242 | 555 | 822 | 1022 | 1255 | 1412 | 1536 | 2990 |      |
| 112 | 263 | 562 | 827 | 1025 | 1281 | 1415 | 1538 | 2993 |      |
| 116 | 271 | 562 | 829 | 1025 | 1319 | 1417 | 1546 | 2996 |      |
| 122 | 274 | 566 | 854 | 1026 | 1326 | 1419 | 1556 | 3001 |      |

**Table S3.** Simulated Franck-Condon physics of  $[2]^+$  as obtained by the B3LYP functional within the equilibrated singlet ground state structure ( $S_0$ ). Prominent dipole-allowed singlet-singlet transitions contributing the UV-vis absorption (left) and spin-forbidden singlet-triplet transitions (right).

| Excitation            | Character                          | $\Delta E$ [eV] | $\lambda$ [nm] | $f$    | Excitation            | Character                          | $\Delta E$ [eV] | $\lambda$ [nm] | $f$ |
|-----------------------|------------------------------------|-----------------|----------------|--------|-----------------------|------------------------------------|-----------------|----------------|-----|
| $S_0 \rightarrow S_i$ |                                    |                 |                |        | $S_0 \rightarrow T_i$ |                                    |                 |                |     |
| $S_1$                 | MC <sub>W</sub> /MLCT <sub>W</sub> | 1.72            | 719            | 0.0140 | $T_1$                 | MC <sub>W</sub> /MLCT <sub>W</sub> | 1.27            | 974            | -   |
| $S_2$                 | MLCT <sub>bpy</sub>                | 1.88            | 658            | 0.0116 | $T_2$                 | MLCT <sub>bpy</sub>                | 1.70            | 728            | -   |
| $S_7$                 | MLCT <sub>bpy</sub> /MMCT          | 2.31            | 536            | 0.0401 | $T_3$                 | MLCT <sub>bpy</sub>                | 1.80            | 689            | -   |
| $S_8$                 | MLCT <sub>bpy</sub>                | 2.37            | 523            | 0.0415 | $T_4$                 | MLCT <sub>bpy</sub>                | 1.90            | 654            | -   |
| $S_9$                 | MLCT <sub>bpy</sub>                | 2.43            | 510            | 0.0748 | $T_5$                 | MLCT <sub>bpy</sub>                | 2.00            | 619            | -   |
| $S_{10}$              | MLCT <sub>bpy</sub> /MMCT          | 2.55            | 486            | 0.0788 | $T_6$                 | MLCT <sub>bpy</sub>                | 2.04            | 608            | -   |
| $S_{13}$              | MLCT <sub>bpy</sub>                | 2.74            | 453            | 0.0294 | $T_7$                 | MLCT <sub>bpy</sub>                | 2.10            | 591            | -   |
| $S_{14}$              | MLCT <sub>bpy</sub> /MMCT          | 2.81            | 441            | 0.0259 | $T_8$                 | MLCT <sub>bpy</sub>                | 2.18            | 567            | -   |
| $S_{19}$              | MLCT <sub>bpy</sub>                | 3.09            | 402            | 0.0365 | $T_9$                 | MLCT <sub>bpy</sub>                | 2.20            | 563            | -   |
| $S_{24}$              | MLCT <sub>bpy</sub>                | 3.20            | 388            | 0.0335 | $T_{10}$              | MLCT <sub>bpy</sub>                | 2.32            | 535            | -   |
| $S_{28}$              | MLCT <sub>bpy</sub>                | 3.28            | 378            | 0.0539 | $T_{11}$              | MLCT <sub>bpy</sub>                | 2.44            | 507            | -   |
| $S_{33}$              | MLCT <sub>bpy</sub>                | 3.41            | 363            | 0.0684 | $T_{12}$              | MLCT <sub>bpy</sub>                | 2.51            | 493            | -   |
| $S_{81}$              | LLCT                               | 4.41            | 281            | 0.1715 | $T_{13}$              | MLCT <sub>bpy</sub> /MMCT          | 2.64            | 470            | -   |
| $S_{86}$              | LLCT                               | 4.48            | 276            | 0.1654 | $T_{14}$              | MLCT <sub>bpy</sub> /MMCT          | 2.68            | 463            | -   |
| $S_{87}$              | LLCT                               | 4.49            | 276            | 0.2619 | $T_{15}$              | MLCT <sub>bpy</sub> /MMCT          | 2.82            | 439            | -   |
|                       |                                    |                 |                |        | $T_{16}$              | MLCT <sub>bpy</sub>                | 2.87            | 431            | -   |
|                       |                                    |                 |                |        | $T_{17}$              | MLCT <sub>bpy</sub>                | 2.88            | 430            | -   |
|                       |                                    |                 |                |        | $T_{18}$              | MLCT <sub>bpy</sub>                | 2.89            | 430            | -   |
|                       |                                    |                 |                |        | $T_{19}$              | MLCT <sub>bpy</sub>                | 2.93            | 423            | -   |
|                       |                                    |                 |                |        | $T_{20}$              | MLCT <sub>bpy</sub>                | 2.98            | 416            | -   |

**Table S4.** Electronic characters – as visualized by charge density differences (CDDs) – of prominent singlet-singlet ( $S_0 \rightarrow S_i$ ) and singlet-triplet ( $S_0 \rightarrow T_i$ ) excitations within the Franck-Condon geometry (i.e.,  $S_0$  equilibrium) of  $[2]^+$  as obtained by the B3LYP functional. Charge transfer takes place from red to blue.

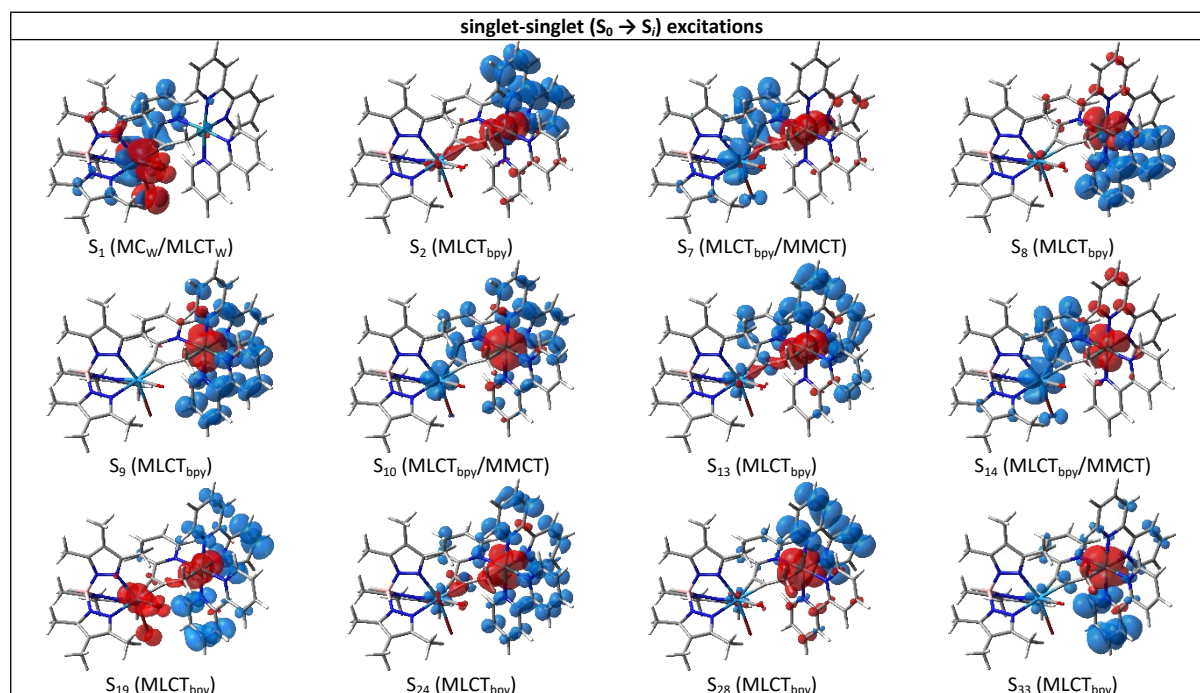

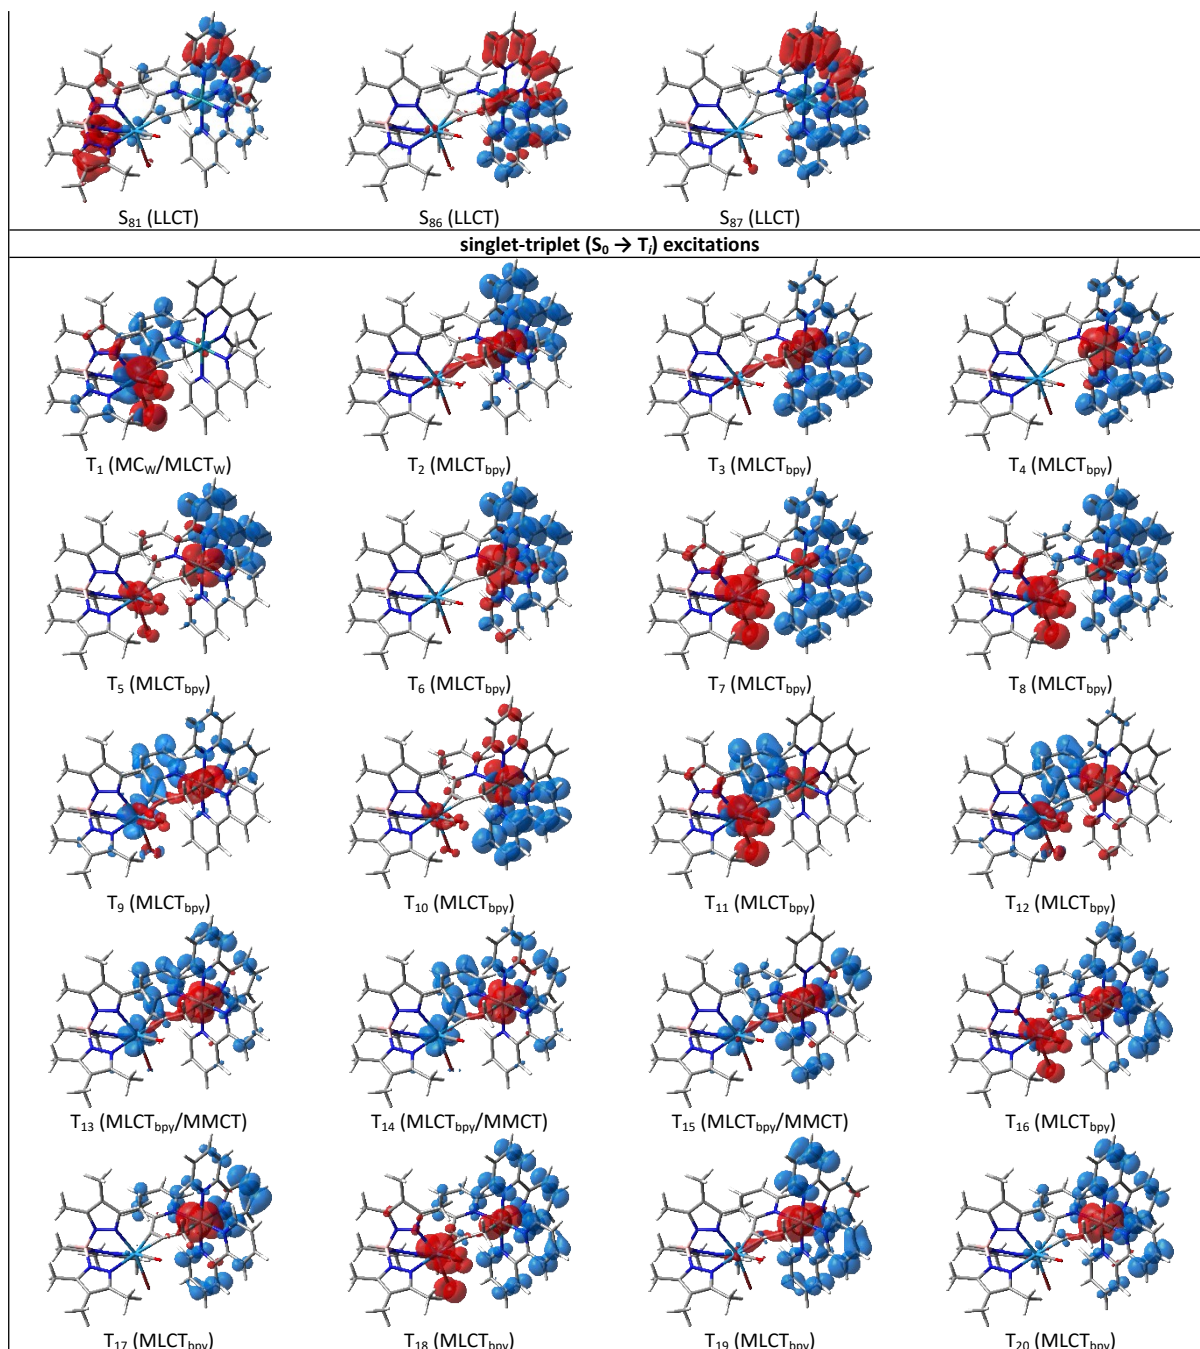

**Table S5.** Spin-orbit coupling elements ( $\langle T_j | \hat{H}_{SOC} | S_i \rangle$  in  $\text{cm}^{-1}$ ) between prominent excited singlet and triplet states of  $[2]^+$ . Excitation energies ( $E$  in eV) are given for all singlet and triplet excitations; oscillator strengths ( $f$ ) are provided for singlet-singlet excitations. The provided triplet states are selected to match the energy level of the highest energy and dipole-allowed singlet transition (i.e. into  $S_{11}$ ). All results were obtained by TD-B3LYP as implemented in Orca 5.0. Large spin-orbit coupling elements between  $S_0$  and  $T_1$  as well as between  $S_{10}$  and  $S_{11}$  and the respective triplet states are highlighted.

|          |                 | $S_0$       | $S_5$  | $S_7$  | $S_8$  | $S_9$  | $S_{10}$   | $S_{11}$   | $S_{17}$ | $S_{18}$ |
|----------|-----------------|-------------|--------|--------|--------|--------|------------|------------|----------|----------|
|          | $f$             | -           | 0.0420 | 0.0272 | 0.0319 | 0.0458 | 0.0678     | 0.0605     | 0.0342   | 0.0158   |
|          | $\Delta E$ [eV] | 0.00        | 2.16   | 2.30   | 2.37   | 2.42   | 2.43       | 2.57       | 2.96     | 2.98     |
| $T_1$    | 0.98            | <b>1440</b> | 341    | 27     | 69     | 68     | <b>123</b> | <b>108</b> | 385      | 401      |
| $T_2$    | 1.73            | 232         | 98     | 236    | 98     | 83     | <b>151</b> | <b>184</b> | 75       | 40       |
| $T_3$    | 1.82            | 147         | 57     | 214    | 208    | 263    | <b>119</b> | <b>119</b> | 32       | 18       |
| $T_4$    | 1.89            | 106         | 78     | 183    | 103    | 137    | 88         | <b>114</b> | 32       | 62       |
| $T_5$    | 2.00            | 388         | 60     | 101    | 113    | 67     | <b>170</b> | <b>151</b> | 156      | 237      |
| $T_6$    | 2.02            | 415         | 90     | 71     | 108    | 73     | <b>189</b> | <b>177</b> | 195      | 266      |
| $T_7$    | 2.04            | 99          | 20     | 28     | 67     | 262    | <b>176</b> | 27         | 31       | 30       |
| $T_8$    | 2.22            | 128         | 30     | 114    | 122    | 98     | 61         | 98         | 6        | 20       |
| $T_9$    | 2.30            | 186         | 125    | 74     | 91     | 19     | 74         | <b>140</b> | 37       | 61       |
| $T_{10}$ | 2.33            | 193         | 298    | 40     | 66     | 54     | 55         | <b>170</b> | 74       | 214      |
| $T_{11}$ | 2.36            | 102         | 31     | 63     | 87     | 57     | 39         | 50         | 33       | 20       |
| $T_{12}$ | 2.46            | 397         | 230    | 17     | 145    | 77     | <b>248</b> | <b>98</b>  | 187      | 552      |
| $T_{13}$ | 2.54            | 328         | 135    | 21     | 36     | 17     | 48         | <b>102</b> | 160      | 658      |
| $T_{14}$ | 2.60            | 441         | 144    | 31     | 76     | 40     | <b>129</b> | <b>92</b>  | 110      | 183      |
| $T_{15}$ | 2.68            | 347         | 240    | 20     | 8      | 13     | 48         | <b>101</b> | 721      | 1630     |
| $T_{16}$ | 2.72            | 610         | 165    | 6      | 80     | 45     | 109        | 85         | 431      | 510      |
| $T_{17}$ | 2.81            | 228         | 213    | 29     | 79     | 49     | 95         | 74         | 1214     | 2024     |
| $T_{18}$ | 2.84            | 391         | 101    | 10     | 56     | 51     | 92         | 38         | 394      | 579      |
| $T_{19}$ | 2.87            | 242         | 62     | 19     | 58     | 29     | 52         | 58         | 88       | 190      |
| $T_{20}$ | 2.90            | 165         | 68     | 59     | 43     | 37     | 22         | 38         | 101      | 170      |

**Table S6.** Intersystem crossing rates ( $k_{\text{ISC}}$  in  $\text{s}^{-1}$ ) between prominent excited singlet and triplet states of  $[2]^+$ . The provided triplet states are selected to match the energy level of the highest energy and dipole-allowed singlet transition (i.e. into  $S_{11}$ ). All results were obtained by TD-B3LYP as implemented in Orca 5.0. Large spin-orbit coupling elements between  $S_0$  and  $T_1$  as well as between  $S_{10}$  and  $S_{11}$  and the respective triplet states are highlighted.

|          |                 | $S_5$                 | $S_7$                 | $S_8$                 | $S_9$                 | $S_{10}$              | $S_{11}$              | $S_{17}$              | $S_{18}$              |
|----------|-----------------|-----------------------|-----------------------|-----------------------|-----------------------|-----------------------|-----------------------|-----------------------|-----------------------|
|          | $f$             | 0.0420                | 0.0272                | 0.0319                | 0.0458                | 0.0678                | 0.0605                | 0.0342                | 0.0158                |
|          | $\Delta E$ [eV] | 2.16                  | 2.30                  | 2.37                  | 2.42                  | 2.43                  | 2.57                  | 2.96                  | 2.98                  |
| $T_1$    | 0.98            | $3.92 \times 10^{11}$ | $1.99 \times 10^9$    | $1.15 \times 10^{10}$ | $1.03 \times 10^{10}$ | $3.35 \times 10^{10}$ | $2.17 \times 10^{10}$ | $1.76 \times 10^{11}$ | $1.88 \times 10^{11}$ |
| $T_2$    | 1.73            | $2.27 \times 10^{11}$ | $7.67 \times 10^{11}$ | $1.06 \times 10^{11}$ | $6.61 \times 10^{10}$ | $2.11 \times 10^{11}$ | $2.18 \times 10^{11}$ | $1.72 \times 10^{10}$ | $4.72 \times 10^9$    |
| $T_3$    | 1.82            | $1.20 \times 10^{11}$ | $8.88 \times 10^{11}$ | $6.53 \times 10^{11}$ | $8.70 \times 10^{11}$ | $1.73 \times 10^{11}$ | $1.13 \times 10^{11}$ | $3.70 \times 10^9$    | $1.05 \times 10^9$    |
| $T_4$    | 1.89            | $3.61 \times 10^{11}$ | $8.99 \times 10^{11}$ | $2.12 \times 10^{11}$ | $3.05 \times 10^{11}$ | $1.22 \times 10^{11}$ | $1.29 \times 10^{11}$ | $4.08 \times 10^9$    | $1.50 \times 10^{10}$ |
| $T_5$    | 2.00            | $4.87 \times 10^{11}$ | $4.88 \times 10^{11}$ | $4.19 \times 10^{11}$ | $1.14 \times 10^{11}$ | $7.01 \times 10^{11}$ | $3.15 \times 10^{11}$ | $1.22 \times 10^{11}$ | $2.71 \times 10^{11}$ |
| $T_6$    | 2.02            | $1.26 \times 10^{12}$ | $2.64 \times 10^{11}$ | $4.08 \times 10^{11}$ | $1.44 \times 10^{11}$ | $9.30 \times 10^{11}$ | $4.55 \times 10^{11}$ | $1.95 \times 10^{11}$ | $3.52 \times 10^{11}$ |
| $T_7$    | 2.04            | $8.13 \times 10^{10}$ | $4.90 \times 10^{10}$ | $1.83 \times 10^{11}$ | $2.11 \times 10^{12}$ | $9.07 \times 10^{11}$ | $1.18 \times 10^{10}$ | $5.24 \times 10^9$    | $4.63 \times 10^9$    |
| $T_8$    | 2.22            | $3.07 \times 10^{10}$ | $3.62 \times 10^{12}$ | $2.17 \times 10^{12}$ | $8.84 \times 10^{11}$ | $3.14 \times 10^{11}$ | $3.28 \times 10^{11}$ | $3.24 \times 10^8$    | $3.04 \times 10^9$    |
| $T_9$    | 2.30            | $1.17 \times 10^{10}$ | $2.57 \times 10^{12}$ | $2.55 \times 10^{12}$ | $6.81 \times 10^{10}$ | $9.21 \times 10^{11}$ | $1.05 \times 10^{12}$ | $1.36 \times 10^{10}$ | $3.62 \times 10^{10}$ |
| $T_{10}$ | 2.33            | $1.07 \times 10^{10}$ | $1.76 \times 10^{11}$ | $1.85 \times 10^{12}$ | $7.85 \times 10^{11}$ | $7.51 \times 10^{11}$ | $1.97 \times 10^{12}$ | $6.34 \times 10^{10}$ | $5.00 \times 10^{11}$ |
| $T_{11}$ | 2.36            | $3.34 \times 10^7$    | $1.31 \times 10^{11}$ | $3.51 \times 10^{12}$ | $1.10 \times 10^{12}$ | $4.71 \times 10^{11}$ | $2.04 \times 10^{11}$ | $1.34 \times 10^{10}$ | $4.73 \times 10^9$    |
| $T_{12}$ | 2.46            | $1.91 \times 10^7$    | $7.75 \times 10^7$    | $1.42 \times 10^{11}$ | $5.08 \times 10^{11}$ | $7.86 \times 10^{12}$ | $1.94 \times 10^{12}$ | $6.17 \times 10^{11}$ | $5.05 \times 10^{12}$ |
| $T_{13}$ | 2.54            | $2.00 \times 10^5$    | $2.78 \times 10^6$    | $1.87 \times 10^8$    | $5.13 \times 10^8$    | $6.82 \times 10^9$    | $4.27 \times 10^{12}$ | $6.28 \times 10^{11}$ | $9.85 \times 10^{12}$ |
| $T_{14}$ | 2.60            | $1.66 \times 10^4$    | $4.01 \times 10^5$    | $5.10 \times 10^7$    | $1.66 \times 10^8$    | $2.66 \times 10^9$    | $1.46 \times 10^{12}$ | $3.94 \times 10^{11}$ | $1.01 \times 10^{12}$ |
| $T_{15}$ | 2.68            | $1.49 \times 10^3$    | $4.74 \times 10^3$    | $1.45 \times 10^4$    | $4.34 \times 10^5$    | $8.85 \times 10^6$    | $3.99 \times 10^{10}$ | $2.65 \times 10^{13}$ | $1.23 \times 10^{14}$ |
| $T_{16}$ | 2.72            | $1.04 \times 10^2$    | $6.31 \times 10^1$    | $2.00 \times 10^5$    | $6.83 \times 10^5$    | $5.95 \times 10^6$    | $3.14 \times 10^9$    | $1.27 \times 10^{13}$ | $1.60 \times 10^{13}$ |
| $T_{17}$ | 2.81            | 3.77                  | $2.82 \times 10^1$    | $3.69 \times 10^3$    | $1.40 \times 10^4$    | $7.94 \times 10^4$    | $3.29 \times 10^7$    | $2.12 \times 10^{14}$ | $5.10 \times 10^{14}$ |
| $T_{18}$ | 2.84            | $2.94 \times 10^{-1}$ | 1.17                  | $6.38 \times 10^2$    | $5.20 \times 10^3$    | $2.50 \times 10^4$    | $2.72 \times 10^6$    | $2.82 \times 10^{13}$ | $5.24 \times 10^{13}$ |
| $T_{19}$ | 2.87            | $3.84 \times 10^{-2}$ | 1.380                 | $2.20 \times 10^2$    | $5.52 \times 10^2$    | $2.59 \times 10^3$    | $2.01 \times 10^6$    | $1.81 \times 10^{12}$ | $7.24 \times 10^{12}$ |
| $T_{20}$ | 2.90            | $1.15 \times 10^{-2}$ | 3.29                  | $2.97 \times 10^1$    | $2.11 \times 10^2$    | $1.12 \times 10^2$    | $1.95 \times 10^5$    | $3.33 \times 10^{12}$ | $8.08 \times 10^{12}$ |

**Table S7.** Intersystem crossing times ( $\tau_{ISC}$  in ps) between prominent excited singlet and triplet states of **[2]<sup>+</sup>**. The provided triplet states are selected to match the energy level of the highest energy and dipole-allowed singlet transition (i.e. into  $S_{11}$ ). All results were obtained by TD-B3LYP as implemented in Orca 5.0. Sub-ps processes are highlighted.

|          |                 | $S_5$                                   | $S_7$                                   | $S_8$                                   | $S_9$                                   | $S_{10}$                                | $S_{11}$                                | $S_{17}$                                | $S_{18}$                                |
|----------|-----------------|-----------------------------------------|-----------------------------------------|-----------------------------------------|-----------------------------------------|-----------------------------------------|-----------------------------------------|-----------------------------------------|-----------------------------------------|
|          | $f$             | 0.0420                                  | 0.0272                                  | 0.0319                                  | 0.0458                                  | 0.0678                                  | 0.0605                                  | 0.0342                                  | 0.0158                                  |
|          | $\Delta E$ [eV] | 2.16                                    | 2.30                                    | 2.37                                    | 2.42                                    | 2.43                                    | 2.57                                    | 2.96                                    | 2.98                                    |
| $T_1$    | 0.98            | 2.55                                    | $5.01 \times 10^2$                      | $8.73 \times 10$                        | $9.68 \times 10$                        | $2.99 \times 10$                        | $4.62 \times 10$                        | 5.69                                    | 5.31                                    |
| $T_2$    | 1.73            | 4.40                                    | 1.30                                    | 9.39                                    | $1.51 \times 10$                        | 4.75                                    | 4.60                                    | $5.83 \times 10$                        | $2.12 \times 10^2$                      |
| $T_3$    | 1.82            | 8.31                                    | 1.13                                    | 1.53                                    | 1.15                                    | 5.78E                                   | 8.84                                    | $2.70 \times 10^2$                      | $9.48 \times 10^2$                      |
| $T_4$    | 1.89            | 2.77                                    | 1.11                                    | 4.72                                    | 3.28                                    | 8.17                                    | 7.76                                    | $2.45 \times 10^2$                      | $6.68 \times 10$                        |
| $T_5$    | 2.00            | 2.05                                    | 2.05                                    | 2.39                                    | 8.78                                    | 1.43                                    | 3.18                                    | 8.18                                    | 3.68                                    |
| $T_6$    | 2.02            | <b><math>7.96 \times 10^{-1}</math></b> | 3.79                                    | 2.45                                    | 6.96                                    | 1.08                                    | 2.20                                    | 5.13                                    | 2.84                                    |
| $T_7$    | 2.04            | $1.23 \times 10$                        | $2.04 \times 10$                        | 5.46                                    | <b><math>4.75 \times 10^{-1}</math></b> | 1.10                                    | $8.45 \times 10$                        | $1.91 \times 10^2$                      | $2.16 \times 10^2$                      |
| $T_8$    | 2.22            | $3.26 \times 10$                        | <b><math>2.76 \times 10^{-1}</math></b> | <b><math>4.60 \times 10^{-1}</math></b> | 1.13                                    | 3.18                                    | 3.05                                    | $3.09 \times 10^3$                      | $3.29 \times 10^2$                      |
| $T_9$    | 2.30            | $8.54 \times 10$                        | <b><math>3.89 \times 10^{-1}</math></b> | <b><math>3.92 \times 10^{-1}</math></b> | $1.47 \times 10$                        | 1.09                                    | <b><math>9.54 \times 10^{-1}</math></b> | $7.33 \times 10$                        | $2.76 \times 10$                        |
| $T_{10}$ | 2.33            | $9.34 \times 10$                        | 5.68                                    | <b><math>5.40 \times 10^{-1}</math></b> | 1.27                                    | 1.33                                    | <b><math>5.07 \times 10^{-1}</math></b> | $1.58 \times 10$                        | 2.00                                    |
| $T_{11}$ | 2.36            | $2.99 \times 10^4$                      | 7.61                                    | <b><math>2.85 \times 10^{-1}</math></b> | <b><math>9.11 \times 10^{-1}</math></b> | 2.12                                    | 4.90                                    | $7.45 \times 10^1$                      | $2.11 \times 10^2$                      |
| $T_{12}$ | 2.46            | $5.23 \times 10^4$                      | $1.29 \times 10^4$                      | 7.07                                    | 1.97                                    | <b><math>1.27 \times 10^{-1}</math></b> | <b><math>5.16 \times 10^{-1}</math></b> | 1.62                                    | <b><math>1.98 \times 10^{-1}</math></b> |
| $T_{13}$ | 2.54            | $5.00 \times 10^6$                      | $3.59 \times 10^4$                      | $5.34 \times 10^3$                      | $1.95 \times 10^3$                      | $1.47 \times 10^2$                      | <b><math>2.34 \times 10^{-1}</math></b> | 1.59                                    | <b><math>1.02 \times 10^{-1}</math></b> |
| $T_{14}$ | 2.60            | $6.02 \times 10^7$                      | $2.50 \times 10^6$                      | $1.96 \times 10^4$                      | $6.02 \times 10^3$                      | $3.76 \times 10^2$                      | <b><math>6.84 \times 10^{-1}</math></b> | 2.54                                    | <b><math>9.95 \times 10^{-1}</math></b> |
| $T_{15}$ | 2.68            | $6.73 \times 10^8$                      | $2.11 \times 10^8$                      | $6.90 \times 10^7$                      | $2.30 \times 10^6$                      | $1.13 \times 10^5$                      | 2.51×10                                 | <b><math>3.78 \times 10^{-2}</math></b> | <b><math>8.16 \times 10^{-3}</math></b> |
| $T_{16}$ | 2.72            | $9.60 \times 10^9$                      | $1.59 \times 10^{10}$                   | $5.00 \times 10^6$                      | $1.46 \times 10^6$                      | $1.68 \times 10^5$                      | $3.18 \times 10^2$                      | <b><math>7.86 \times 10^{-2}</math></b> | <b><math>6.26 \times 10^{-2}</math></b> |
| $T_{17}$ | 2.81            | $2.65 \times 10^{11}$                   | $3.55 \times 10^{10}$                   | $2.71 \times 10^8$                      | $7.13 \times 10^7$                      | $1.26 \times 10^7$                      | $3.04 \times 10^4$                      | <b><math>4.72 \times 10^{-3}</math></b> | <b><math>1.96 \times 10^{-3}</math></b> |
| $T_{18}$ | 2.84            | $3.40 \times 10^{12}$                   | $8.53 \times 10^{11}$                   | $1.57 \times 10^9$                      | $1.92 \times 10^8$                      | $4.00 \times 10^7$                      | $3.68 \times 10^5$                      | <b><math>3.54 \times 10^{-2}</math></b> | <b><math>1.91 \times 10^{-2}</math></b> |
| $T_{19}$ | 2.87            | $2.61 \times 10^{13}$                   | $7.24 \times 10^{11}$                   | $4.54 \times 10^9$                      | $1.81 \times 10^9$                      | $3.87 \times 10^8$                      | $4.97 \times 10^5$                      | <b><math>5.53 \times 10^{-1}</math></b> | <b><math>1.38 \times 10^{-1}</math></b> |
| $T_{20}$ | 2.90            | $8.72 \times 10^{13}$                   | $3.04 \times 10^{11}$                   | $3.37 \times 10^{10}$                   | $4.74 \times 10^9$                      | $8.93 \times 10^9$                      | $5.14 \times 10^6$                      | <b><math>3.01 \times 10^{-1}</math></b> | <b><math>1.24 \times 10^{-1}</math></b> |

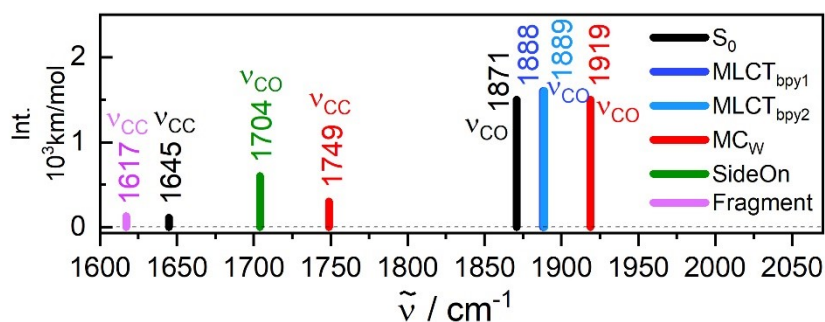

**Figure S4.** Simulated IR spectra of the W-Ru complex  $[2]^+$  obtained at the B3LYP/def2-SVP level of theory for the ground state at the Franck-Condon point and the fully relaxed  ${}^3\text{MLCT}_{\text{bpy}2}$  (light blue),  ${}^3\text{MLCT}_{\text{bpy}1}$  (dark blue),  ${}^3\text{MC}_W$  (red), the Side-on species (green), and the fragment after CO abstraction (pink).

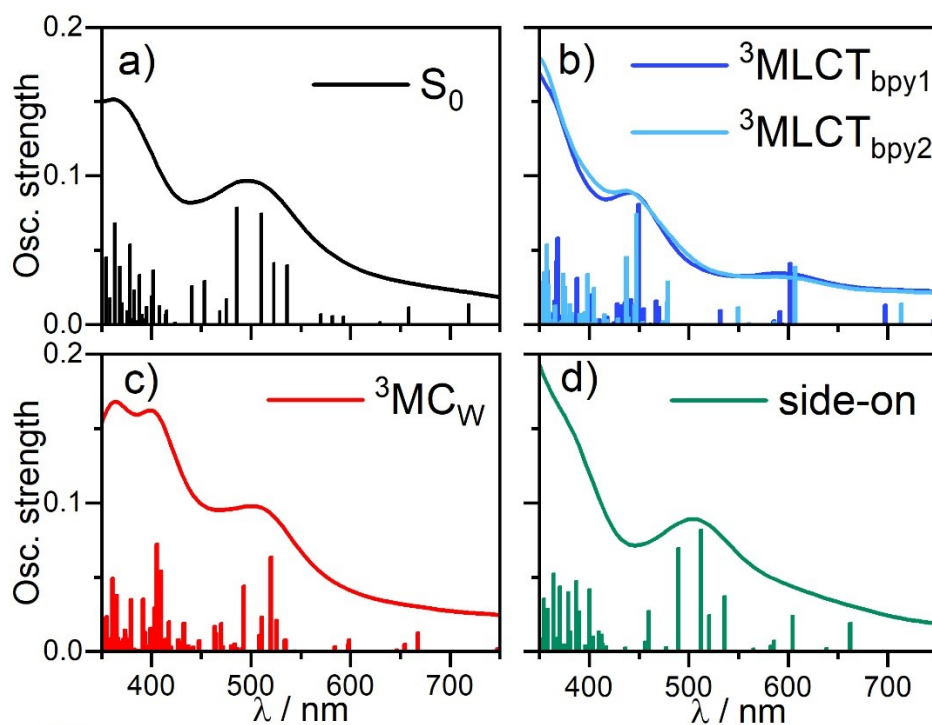

**Figure S5.** Simulated electronic absorption spectra for the W-Ru complex  $[2]^+$  obtained at the B3LYP/def2-SVP level of theory given by dipole-allowed singlet-singlet transitions for the ground state at the Franck-Condon point (a) and the *side-on* geometry (d), as well as triplet-triplet transitions for the fully relaxed  ${}^3\text{MLCT}_{\text{bpy}2}/{}^3\text{MLCT}_{\text{bpy}1}$  (b) and  ${}^3\text{MC}_W$  (c) states. The absorption spectra in (a)-(d) were obtained by convolution of the calculated stick spectra with a Lorentzian line shape function of 0.4 eV width (FWHM).

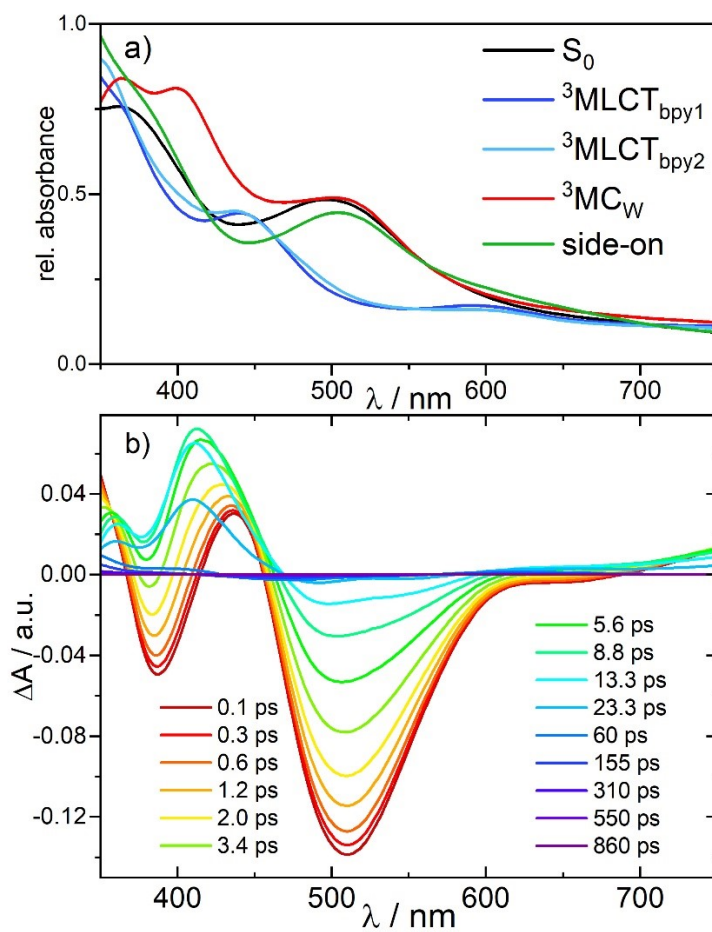

**Figure S6.** (a) Comparison of the simulated electronic absorption spectra for the W-Ru complex  $[2]^+$  from Figure S5. (b) Simulated temporal evolution of the UV-vis transients based on the kinetic model presented in Figure 7 of the main paper.

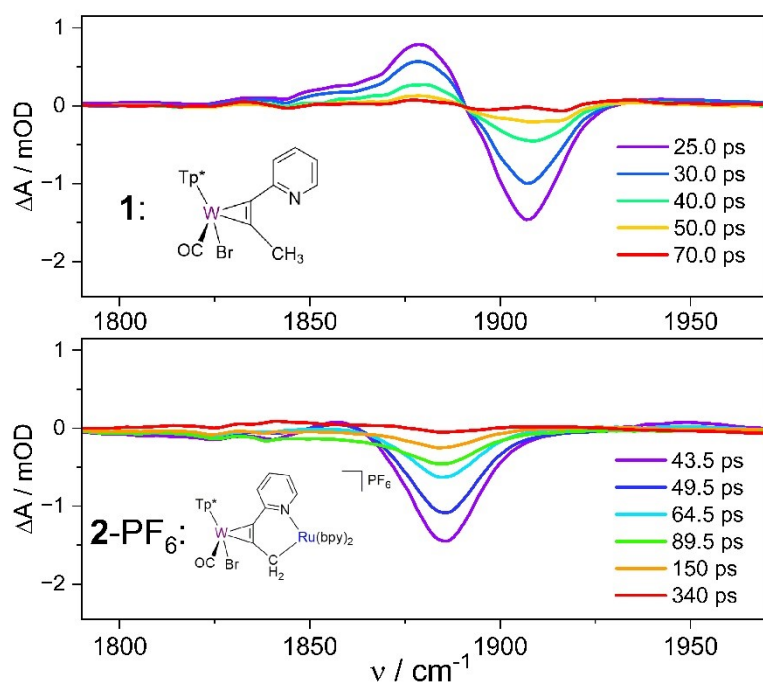

**Figure S7.** Transient IR spectra for **1** (upper panel) and **2-PF<sub>6</sub>** (lower panel) at large pump-probe delays. During the recovery of the ground state of **1**, the bleaching of the  $\nu = 0 \rightarrow 1$  transition is balanced by red-shifted positive absorptions from excited CO vibrational states. For **2-PF<sub>6</sub>**, these excited state bands are absent during the lifetime of  $I$ .

**Table S8.** Simulated excited state properties contributing to the excited-state absorption of  $[2]^+$  as obtained by B3LYP/def2-SVP within the equilibrated  ${}^3\text{MLCT}_{\text{bpy}2}$ ,  ${}^3\text{MLCT}_{\text{bpy}1}$ ,  ${}^3\text{MC}_W$  and  ${}^1\text{side-on}$ . Prominent dipole-allowed triplet-triplet ( ${}^3\text{MLCT}_{\text{bpy}2}$ ,  ${}^3\text{MLCT}_{\text{bpy}1}$ ,  ${}^3\text{MC}_W$ ) and singlet-singlet transitions ( ${}^1\text{side-on}$ ) are indicated.

| ${}^3\text{MLCT}_{\text{bpy}2}$ (1.54 eV), triplet-triplet ( $T_1 \rightarrow T_i$ ) excitations |                            |                 |                |        | relaxed ${}^3\text{MLCT}_{\text{bpy}1}$ (1.32 eV)                                     |                                        |                 |                |        |
|--------------------------------------------------------------------------------------------------|----------------------------|-----------------|----------------|--------|---------------------------------------------------------------------------------------|----------------------------------------|-----------------|----------------|--------|
| Excitation                                                                                       | Character                  | $\Delta E$ [eV] | $\lambda$ [nm] | $f$    | Excitation                                                                            | Character                              | $\Delta E$ [eV] | $\lambda$ [nm] | $f$    |
| $T_1 \rightarrow T_i$                                                                            |                            |                 |                |        | $T_1 \rightarrow T_i$                                                                 |                                        |                 |                |        |
| $T_{11}$                                                                                         | $\text{IL}_{\text{bpy}}$   | 1.50            | 826            | 0.0161 | $T_{11}$                                                                              | $\text{IL}_{\text{bpy}}$               | 1.56            | 794            | 0.0231 |
| $T_{14}$                                                                                         | $\text{LMCT}_{\text{bpy}}$ | 2.04            | 607            | 0.0391 | $T_{14}$                                                                              | $\text{LMCT}_{\text{bpy}}$             | 2.06            | 602            | 0.0413 |
| $T_{22}$                                                                                         | $\text{MLCT}_{\text{bpy}}$ | 2.59            | 479            | 0.0293 | $T_{24}$                                                                              | $\text{MLCT}_{\text{bpy}}$             | 2.65            | 467            | 0.0161 |
| $T_{29}$                                                                                         | $\text{IL}_{\text{bpy}}$   | 2.77            | 447            | 0.0745 | $T_{27}$                                                                              | $\text{IL}_{\text{bpy}}$               | 2.76            | 450            | 0.0812 |
| $T_{32}$                                                                                         | $\text{MLCT}_{\text{bpy}}$ | 2.83            | 437            | 0.0456 | $T_{40}$                                                                              | $\text{MLCT}_{\text{bpy}}$             | 3.08            | 403            | 0.0203 |
| $T_{40}$                                                                                         | $\text{MLCT}_{\text{bpy}}$ | 3.06            | 405            | 0.0247 |                                                                                       |                                        |                 |                |        |
| ${}^3\text{MC}_W$ (0.82 eV), triplet-triplet ( $T_1 \rightarrow T_i$ ) excitations               |                            |                 |                |        | ${}^1\text{Side-on}$ (1.83 eV), triplet-triplet ( $S_0 \rightarrow S_i$ ) excitations |                                        |                 |                |        |
| Excitation                                                                                       | Character                  | $\Delta E$ [eV] | $\lambda$ [nm] | $f$    | Excitation                                                                            | Character                              | $\Delta E$ [eV] | $\lambda$ [nm] | $f$    |
| $T_1 \rightarrow T_i$                                                                            |                            |                 |                |        | $S_0 \rightarrow S_i$                                                                 |                                        |                 |                |        |
| $T_4$                                                                                            | $\text{MLCT}_W$            | 1.62            | 764            | 0.0239 | $S_2$                                                                                 | $\text{MLCT}_{\text{bpy}}$             | 1.87            | 662            | 0.0194 |
| $T_{22}$                                                                                         | $\text{MLCT}_{\text{bpy}}$ | 2.38            | 520            | 0.0637 | $S_4$                                                                                 | $\text{MLCT}_{\text{bpy}}/\text{MMCT}$ | 2.05            | 604            | 0.0242 |
| $T_{23}$                                                                                         | $\text{LMCT}_W$            | 2.39            | 520            | 0.0192 | $S_8$                                                                                 | $\text{MLCT}_{\text{bpy}}/\text{MMCT}$ | 2.31            | 536            | 0.0375 |
| $T_{24}$                                                                                         | $\text{MLCT}_{\text{bpy}}$ | 2.43            | 511            | 0.0235 | $S_{10}$                                                                              | $\text{MLCT}_{\text{bpy}}$             | 2.42            | 512            | 0.0822 |
| $T_{26}$                                                                                         | $\text{MLCT}_{\text{bpy}}$ | 2.52            | 493            | 0.0443 | $S_{11}$                                                                              | $\text{MLCT}_{\text{bpy}}/\text{MMCT}$ | 2.53            | 489            | 0.0696 |
| $T_{53}$                                                                                         | $\text{MC}_W$              | 3.03            | 409            | 0.0541 | $S_{13}$                                                                              | $\text{MLCT}_{\text{bpy}}$             | 2.70            | 460            | 0.0276 |
| $T_{55}$                                                                                         | $\text{MLCT}_{\text{bpy}}$ | 3.06            | 405            | 0.0726 |                                                                                       |                                        |                 |                |        |

**Table S9.** Electronic characters – as visualized by charge density differences (CDDs) – of prominent triplet-triplet ( $T_1 \rightarrow T_i$ ) transitions ( ${}^3\text{MLCT}_{\text{bpy}2}$ ,  ${}^3\text{MLCT}_{\text{bpy}1}$  and  ${}^3\text{MC}_W$ ) and singlet-singlet ( $S_0 \rightarrow S_i$ ) excitations within the fully equilibrated photo-intermediates of  $[2]^+$  as obtained by the B3LYP functional. Charge transfer takes place from red to blue.

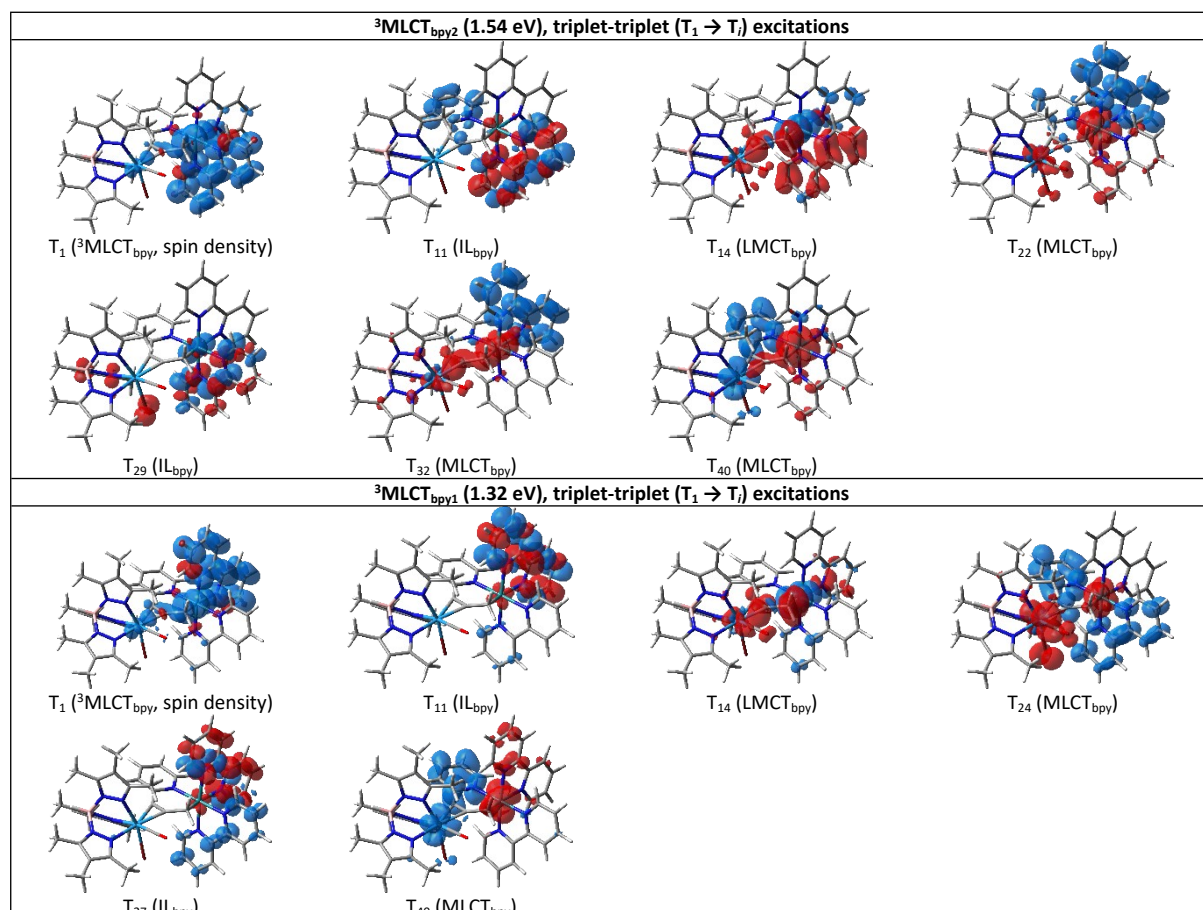

**$^3\text{MC}_w$  (0.82 eV), triplet-triplet ( $T_1 \rightarrow T_i$ ) excitations**

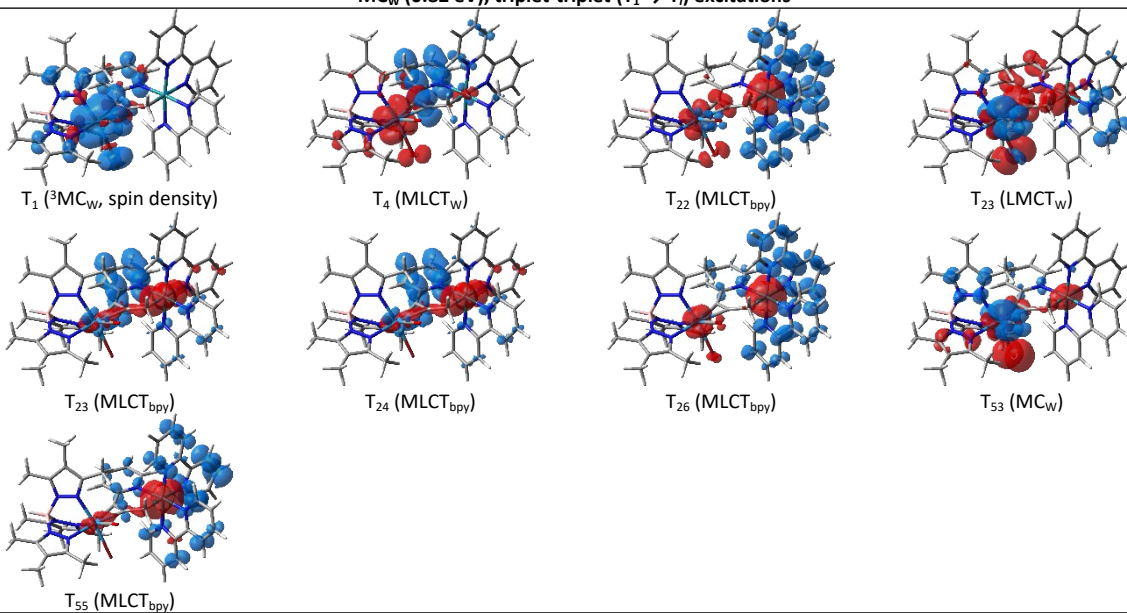

**$^1\text{side-on}$  (1.83 eV), triplet-triplet ( $S_0 \rightarrow S_i$ ) excitations**

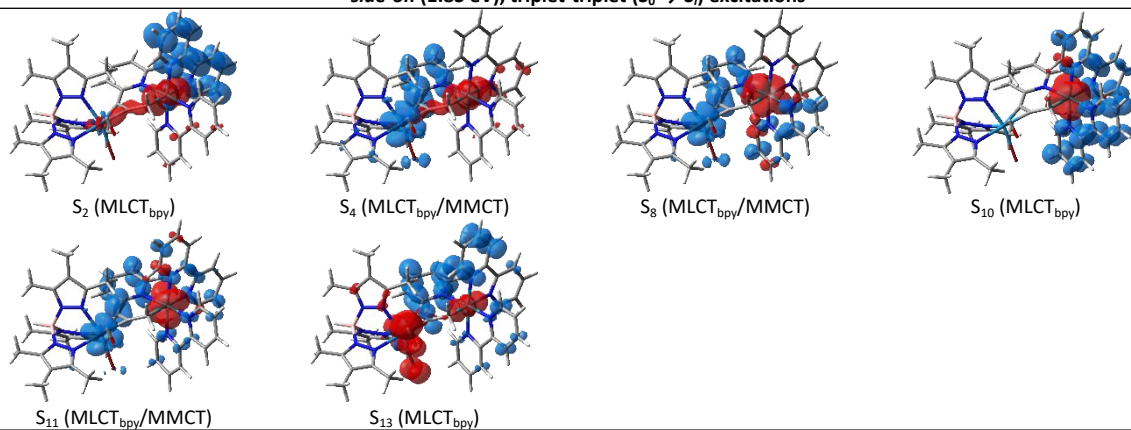

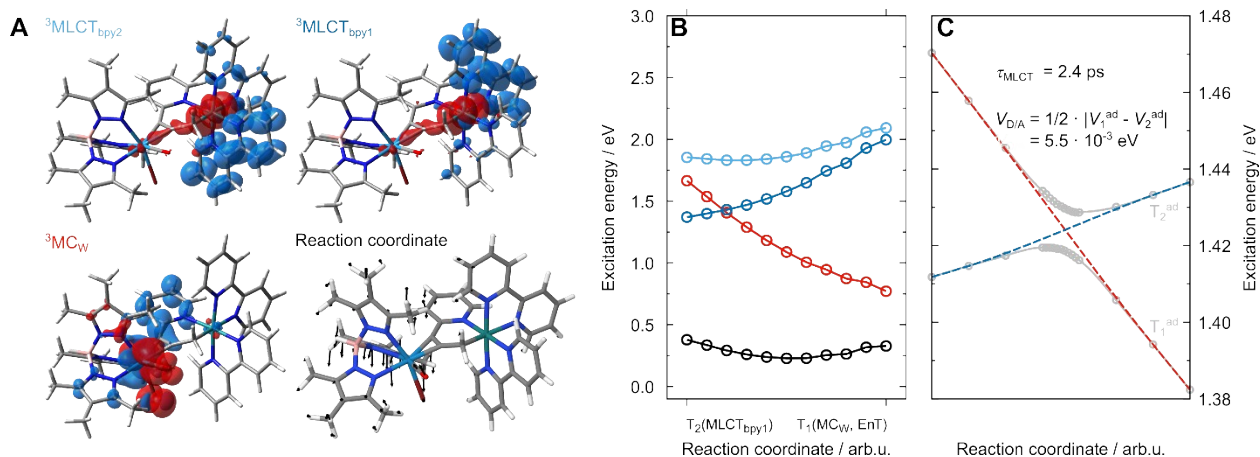

**Figure S8. A:** Electronic characters of triplet states involved in the  ${}^3\text{MLCT}_{\text{bpy}}\text{-}{}^3\text{MC}_W$  population transfer of  $[\mathbf{2}]^+$  as visualized by charge density difference plots (charge transfer occurs from red to blue) and linear-interpolated internal coordinate (LIIC) connecting the fully equilibrated  ${}^3\text{MLCT}_{\text{bpy}1}$  and  ${}^3\text{MC}_W$  structures. **B:** Potential energy curves of the respective electronic states (in addition  $S_0$ , in black) along the LIIC. **C:** Zoomed in crossing region between the diabatic states of interest, i.e. the  ${}^3\text{MLCT}_{\text{bpy}1}$  donor state and the  ${}^3\text{MC}_W$  acceptor state; adiabatic energies ( $T_1$  and  $T_2$ ) are shown in grey. Simulated lifetime obtained as  $(k)^{-1}$  (see S18) and potential coupling  $V_{D/A}$  as (see S20) are provided as inset. Diabatization was performed by following the electronic character of the states of interest.

### 3. References

- 1 J. Franz, M. Oelschlegel, J. P. Zobel, S.-A. Hua, J.-H. Bortler, L. Schmid, G. Morselli, O. S. Wenger, D. Schwarzer, F. Meyer, and L. González *J. Am. Chem. Soc.* 2024, **146**, 11272.
- 2 M. J. Frisch, G. W. Trucks, H. B. Schlegel, G. E. Scuseria, M. A. Robb, J. R. Cheeseman, G. Scalmani, V. Barone, G. A. Petersson, H. Nakatsuji, X. Li, M. Caricato, A. V. Marenich, J. Bloino, B. G. Janesko, R. Gomperts, B. Mennucci, H. P. Hratchian, J. V. Ortiz, A. F. Izmaylov, J. L. Sonnenberg, D. Williams-Young, F. Ding, F. Lipparini, F. Egidi, J. Goings, B. Peng, A. Petrone, T. Henderson, D. Ranasinghe, V. G. Zakrzewski, J. Gao, N. Rega, G. Zheng, W. Liang, M. Hada, M. Ehara, K. Toyota, R. Fukuda, J. Hasegawa, M. Ishida, T. Nakajima, Y. Honda, O. Kitao, H. Nakai, T. Vreven, K. Throssell, J. A. Montgomery, Jr., J. E. Peralta, F. Ogliaro, M. J. Bearpark, J. J. Heyd, E. N. Brothers, K. N. Kudin, V. N. Staroverov, T. A. Keith, R. Kobayashi, J. Normand, K. Raghavachari, A. P. Rendell, J. C. Burant, S. S. Iyengar, J. Tomasi, M. Cossi, J. M. Millam, M. Klene, C. Adamo, R. Cammi, J. W. Ochterski, R. L. Martin, K. Morokuma, O. Farkas, J. B. Foresman, D. J. Fox, *Gaussian 16*; Gaussian, Inc., Wallingford CT, 2016.
- 3 a) A. D. Becke *J. Chem. Phys.* 1993, **98**, 5648; b) A. D. Becke, *Phys. Rev. A Gen. Phys.* 1988, **38**, 3098; c) C. Lee, W. Yang, R. G. Parr, *Phys. Rev. B, Condens. Matter* 1988, **37**, 785.
- 4 a) F. Weigend, R. Ahlrichs, *Phys. Chem. Chem. Phys.* 2005, **7**, 2663933; b) F. Weigend, *Phys. Chem. Chem. Phys.* 2006, **8**, 1057.
- 5 S. Grimme, S. Ehrlich, L. Goerigk, *J. Comput. Chem.* 2011, **32**, 1456.
- 6 a) A. V. Marenich, C. J. Cramer, D. G. Truhlar, *J. Phys. Chem. B* 2009, **113**, 6378; b) B. Mennucci, C. Cappelli, C. A. Guido, R. Cammi, J. Tomasi, *J. Phys. Chem. A* 2009, **113**, 3009.
- 7 a) J. P. Merrick, D. Moran, L. Radom, *J. Phys. Chem. A* 2007, **111**, 11683; b) <https://cccbdb.nist.gov/vibscalejustx.asp>.
- 8 S. Kupfer, Zenodo, 2025, doi.org/10.5281/zenodo.15083786.
- 9 a) L. Zedler, A. K. Mengele, K. M. Ziems, Y. Zhang, M. Wächtler, S. Gräfe, T. Pascher, S. Rau, S. Kupfer, B. Dietzek, *Angew. Chem. Int. Ed.* 2019, **58**, 13140; b) G. Yang, G. E. Shillito, C. Zens, B. Dietzek-Ivanšić, S. Kupfer, *J. Chem. Phys.* 2023, **159**, 024109; c) G. E. Shillito, S. Rau, S. Kupfer, *ChemCatChem* 2023, **15**, e202201489; d) L. Zedler, S. Kupfer, H. Schmidt, B. Dietzek-Ivanšić, *Chem. Eur. J.* 2024, **30**, e202303079; e) G. Yang, L. Blechschmidt, L. Zedler, C. Zens, K. Witas, M. Schmidt, B. Esser, S. Rau, G. E. Shillito, B. Dietzek-Ivanšić, S. Kupfer, *Chem. Eur. J.* 2025, **31**, e202404671.
- 10 F. Neese, F. Wennmohs, U. Becker, C. Riplinger, *J. Chem. Phys.* 2020, **152**, 224108.
- 11 K. Shizu, H. Kaji, *J. Phys. Chem. A* 2021, **125**, 9000.
- 12 G. Yang, G. E. Shillito, P. Seeber, O. S. Wenger and S. Kupfer, *Chem. Sci.* 2025, **16**, 18113.
- 13 a) A. Koch, D. Kinzel, F. Dröge, S. Gräfe, S. Kupfer, *J. Phys. Chem. C* 2017, **121**, 16066; b) M. Staniszewska, S. Kupfer, J. Guthmuller, *Chem. Eur. J.* 2018, **24**, 11166; c) M. Staniszewska, S. Kupfer, J. Guthmuller, *J. Phys. Chem. C* 2019, **123**, 16003; d) C. Zens, C. Friebe, U. S. Schubert, M. Richter, S. Kupfer, *ChemSusChem.* 2023, **16**, e202201679.
